# Supplementary material
Source: PubMed Central journal article supplement (PMC5327052)
Supplement: Supp_Table1.pdf [file Supp_Table1.pdf]

## Supplementary Data

SUPPLEMENTARY TABLE S1. CORRELATION ANALYSIS  
BETWEEN EXPERIMENTAL DATA  
AND POSTMORTEM INTERVAL

| <i>Data vs. PMI</i>      | <i>Pearson r</i> | <i>p</i> |
|--------------------------|------------------|----------|
| Poly Ub total levels     | -0.3595          | 0.084    |
| Poly Ub K63 total levels | -0.3821          | 0.071    |
| Poly Ub K48 total levels | -0.2174          | 0.266    |
| Poly Ub K63/UCH-L1       | -0.2504          | 0.287    |
| Poly Ub K48/UCH-L1       | -0.2329          | 0.323    |
| Poly Ub K63/Gelsolin     | 0.1321           | 0.589    |
| Poly Ub K48/Gelsolin     | -0.021           | 0.937    |
| Poly Ub K63/Ubiquilin 1  | 0.503            | 0.055    |
| Poly Ub K48/Ubiquilin 1  | -0.4614          | 0.083    |

PMI, postmortem interval; Ub, ubiquitin; UCH-L1, ubiquitin carboxyl-terminal hydrolase isozyme L1.
